# Supplementary material for: Relevance of charges and polymer mechanical stiffness in the mechanism and kinetics of formation of liponanoparticles probed by the supported bilayer model approach
Source: Royal Society of Chemistry journal article supplement (doi:10.1039/c8cp06955g), 2019-01-01
Supplement: c8cp06955g1.pdf [file c8cp06955g1.pdf]

## Supplementary Information

Relevance of charges and polymer mechanical stiffness in the mechanism and kinetics of formation of liponanoparticles probed by the supported bilayer model approach.

Marline N'Diaye<sup>a</sup>, Jean-Philippe Michel<sup>a</sup>, Veronique Rosilio<sup>a\*</sup>

<sup>a</sup> Institut Galien Paris-Sud, CNRS, Univ. Paris-Sud, Université Paris-Saclay, 92296 Châtenay-Malabry, France

\* Corresponding author: [veronique.rosilio@u-psud.fr](mailto:veronique.rosilio@u-psud.fr)

### S1. Compressibility moduli and surface potential of a PDLLA monolayer spread at the air-water interface

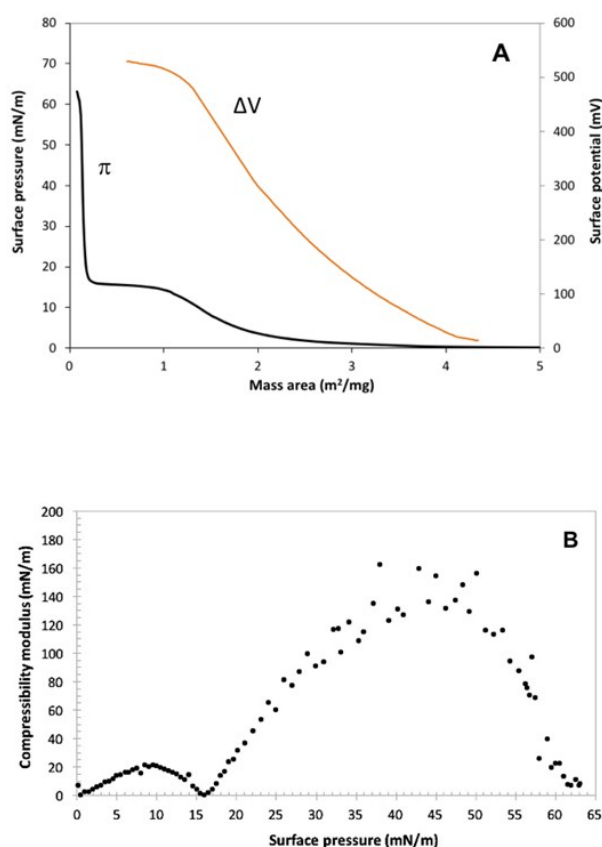

Figure S1: (A) Surface pressure and surface potential-area isotherms; (B) Compressibility moduli deduced from the PDLLA  $\pi$ -A isotherm in (A).

## S2. Glass surface functionalization with hydrophobic silane HMDS

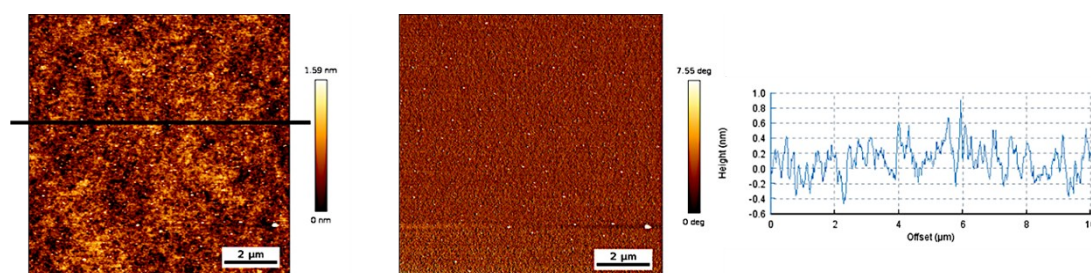

Figure S2: AFM height (left) and phase (right) pictures in water of the glass surface functionalized with HMDS. Height cross section performed along the black line is shown on the right side.

## S3. Langmuir-Schaefer transfer of a PDLLA monolayer onto the HDMS-functionalized glass surface at 18 and 35 mN/m

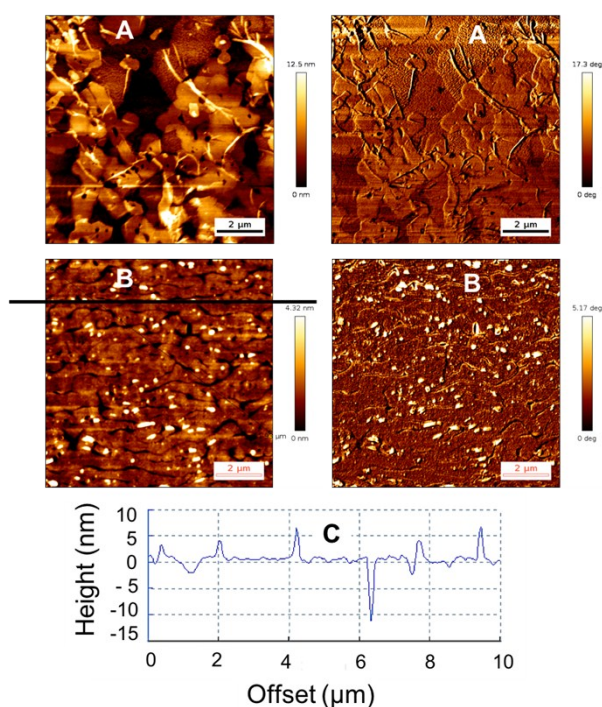

Figure S3: AFM height (left) and phase (right) pictures in water of the glass surface functionalized with HMDS after LS transfer of PDLLA monolayers at 18 (A) and 35 mN/m (B). Height cross section performed along black line depicted on height picture at 35 mN/m is shown in (C).

#### S4. Force-distance measurement on LS-transferred PDLLA film using AFM

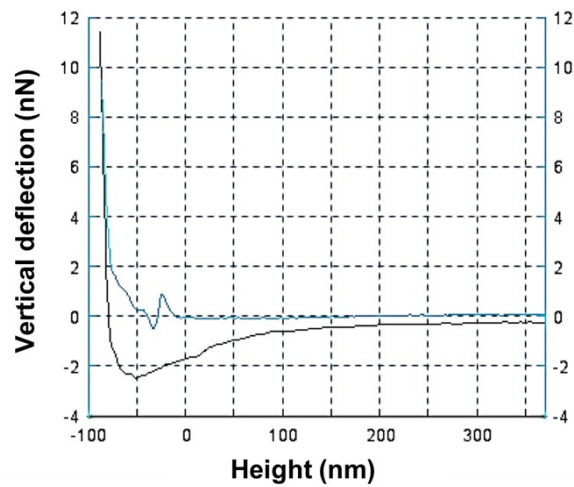

Figure S4: Force-distance measurement performed in water on the PDLLA film transferred at 25 mN/m. Approach and retract curves are displayed as vertical deflection (in nN) of the cantilever versus the AFM head height (in nm).

#### S5. Measurement the adsorption of POPC-DOTAP 75/25 liposomes onto a SiO<sub>2</sub>-coated quartz crystal sensor surface

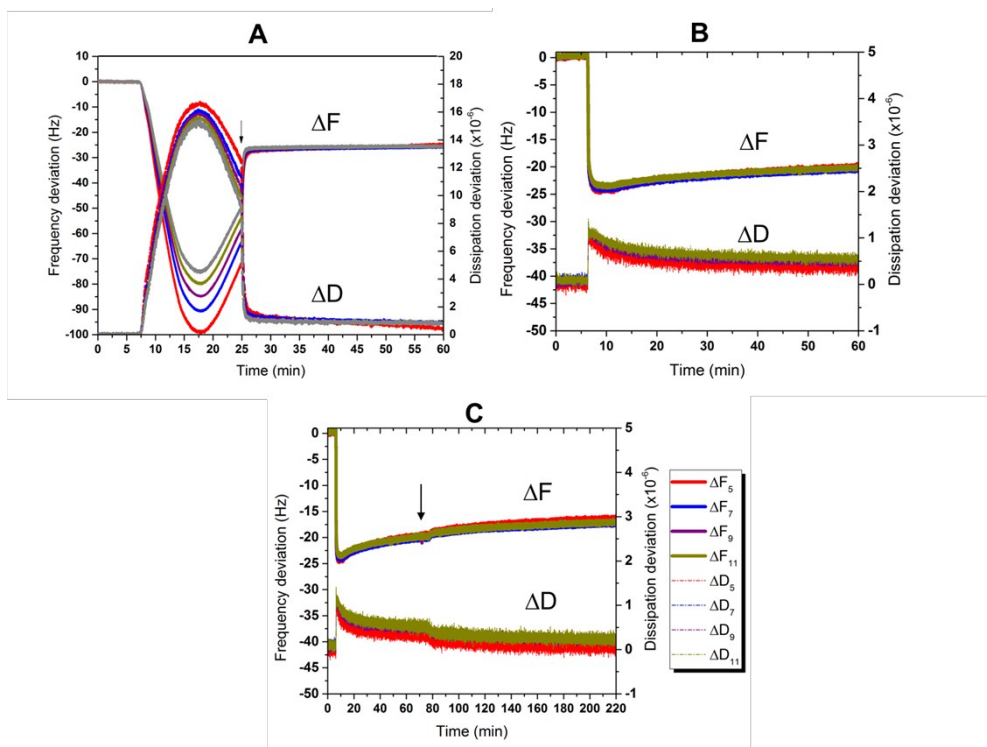

Figure S5:  $\Delta F$  and  $\Delta D$  values for (A) POPC (0.4 mM), (B) and (C) POPC-DOTAP (75:25) liposomes (4 mM) on the SiO<sub>2</sub>-coated quartz crystal QCM-D sensor. Whereas (B) is an enlargement of the plot for the first hour, (C) shows the whole QCM-D experiment. Arrows indicate the rinsing step.
